# Supplementary material for: Fine-Scale Assessment of Greenhouse Gases Fluxes from a Boreal Peatland Pond
Source: MDPI journal article supplement (doi:10.3390/w15020307), 2023-01-11
Supplement: s1 [file s1]

# Fine-Scale Assessment of Greenhouse Gases Fluxes from a Boreal Peatland Pond

Jing Xue <sup>1,2</sup>, Xinan Chen <sup>1,2</sup>, Xianwei Wang <sup>3</sup> and Xiaoxin Sun <sup>1,2,\*</sup>

<sup>1</sup> Key Laboratory of Sustainable Forest Ecosystem Management-Ministry of Education, School of Forestry, Northeast Forestry University, Harbin 150040, China; xuejing@nefu.edu.cn (J.X.); 18568870801@163.com (X.C.)

<sup>2</sup> Heilongjiang Sanjiang Plain Wetland Ecosystem Research Station, Fuyuan 156500, China

<sup>3</sup> Key Laboratory of Wetland Ecology and Environment, Northeast Institute of Geography and Agroecology, Chinese Academy of Sciences, Changchun 130102, China; wangxianwei@iga.ac.cn

\* Correspondence: sunxiaoxin@nefu.edu.cn

**Table S1.** Hydrochemical parameter data in the water column in pelagic zone of the pond.

| Sampling Date  | Water temperature (°C) | Pelagic Zone             |                           |                          |                          |                           |             |                                    |                                    |                                     |
|----------------|------------------------|--------------------------|---------------------------|--------------------------|--------------------------|---------------------------|-------------|------------------------------------|------------------------------------|-------------------------------------|
|                |                        | DO (mg l <sup>-1</sup> ) | DOC (mg l <sup>-1</sup> ) | TN (mg l <sup>-1</sup> ) | TP (mg l <sup>-1</sup> ) | EC (ms cm <sup>-1</sup> ) | pH          | CH <sub>4</sub> concentration (μM) | CO <sub>2</sub> concentration (μM) | N <sub>2</sub> O concentration (μM) |
| Jun 12th, 2021 | 10.75                  | 8.31                     | 29.91                     | 3.07                     | 0.133                    | 0.056                     | 6.81        | 0.089                              | 222.041                            | 0.028                               |
| Jun 20th, 2021 | 19.81                  | 5.42                     | 33.48                     | 3.00                     | 0.036                    | 0.069                     | 7.16        | 0.098                              | 136.784                            | 0.015                               |
| Jun 28th, 2021 | 19.73                  | 6.09                     | 30.13                     | 2.78                     | 0.090                    | 0.070                     | 7.09        | 0.090                              | 112.763                            | 0.009                               |
| Jul 06th, 2021 | 24.95                  | 5.89                     | 47.69                     | 2.42                     | 0.113                    | 0.108                     | 7.00        | 0.045                              | 158.808                            | 0.009                               |
| Jul 14th, 2021 | 14.60                  | 7.42                     | 47.95                     | 2.38                     | 0.079                    | 0.104                     | 7.33        | 0.050                              | 255.755                            | 0.011                               |
| Jul 22th, 2021 | 16.88                  | 6.00                     | 48.75                     | 3.60                     | 0.091                    | 0.095                     | 6.74        | 0.342                              | 240.531                            | 0.012                               |
| Jul 30th, 2021 | 17.20                  | 3.77                     | 32.01                     | 3.07                     | 0.018                    | 0.094                     | 6.63        | 0.170                              | 198.643                            | 0.008                               |
| Aug 06th, 2021 | 17.41                  | 5.77                     | 33.42                     | 1.76                     | 0.047                    | 0.107                     | 7.03        | 0.088                              | 326.153                            | 0.011                               |
| Aug 15th, 2021 | 16.7                   | 4.93                     | 43.05                     | 1.16                     | 0.032                    | 0.133                     | 7.10        | 0.191                              | 393.814                            | 0.012                               |
| Aug 22th, 2021 | 10.95                  | 6.77                     | 45.24                     | 1.15                     | 0.044                    | 0.108                     | 7.03        | 0.135                              | 260.861                            | 0.008                               |
| Aug 29th, 2021 | 13.09                  | 4.52                     | 61.86                     | 1.52                     | 0.056                    | 0.110                     | 7.14        | 0.074                              | 242.162                            | 0.016                               |
| Sep 05th, 2021 | 7.14                   | 7.01                     | 37.33                     | 2.69                     | 0.016                    | 0.054                     | 7.44        | 0.625                              | 236.609                            | 0.014                               |
| Sep 12th, 2021 | 7.90                   | 7.05                     | 41.82                     | 1.43                     | 0.018                    | 0.092                     | 6.27        | 0.052                              | 187.017                            | 0.012                               |
| Sep 19th, 2021 | 11.65                  | 7.06                     | 37.46                     | 1.15                     | 0.013                    | 0.101                     | 6.78        | 0.491                              | 210.607                            | 0.017                               |
| Sep 26th, 2021 | 4.28                   | 10.01                    | 28.10                     | 1.67                     | 0.020                    | 0.087                     | 6.03        | 1.322                              | 116.209                            | 0.011                               |
| <b>Mean</b>    | <b>14.20</b>           | <b>6.40</b>              | <b>39.88</b>              | <b>2.19</b>              | <b>0.054</b>             | <b>0.093</b>              | <b>6.90</b> | <b>0.257</b>                       | <b>219.917</b>                     | <b>0.013</b>                        |

Note: Values are mean values, n=3.
